# Supplementary material for: Effect of illumination and Se vacancies on fast oxidation of ultrathin gallium selenide
Source: Royal Society of Chemistry journal article supplement (doi:10.1039/c8nr01533c), 2018-01-01
Supplement: c8nr01533c1.pdf [file c8nr01533c1.pdf]

## Supporting Information

# Effect of Light illumination and Se vacancy Toward Fast Oxidation of Ultrathin Gallium selenide

Li Shi,<sup>1</sup> Qiang Li,<sup>1\*</sup> Yixin Ouyang,<sup>1</sup> and Jinlan Wang<sup>1,2\*</sup>

<sup>1</sup>School of Physics, Southeast University, Nanjing 211189, China

<sup>2</sup>Synergetic Innovation Center for Quantum Effects and Applications (SICQEA),

Hunan Normal University, Changsha, Hunan 410081, China

\*Corresponding Author: E-mail: [jlwang@seu.edu.cn](mailto:jlwang@seu.edu.cn); [Qiang.li@seu.edu.cn](mailto:Qiang.li@seu.edu.cn)

### 1. Adsorbed structures of H<sub>2</sub>O and O<sub>2</sub>

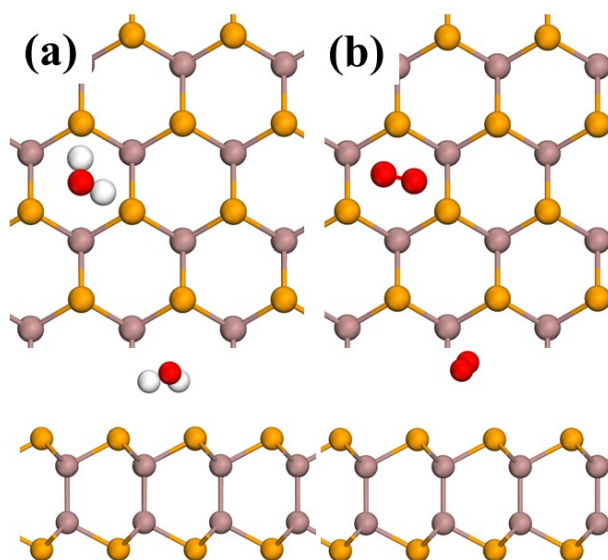

**Fig. S1.** Structures (top and side views) of H<sub>2</sub>O (a) and O<sub>2</sub> (b) adsorb on vacancy-free GaSe surface, respectively. Ga, Se, O and H atoms are labeled as brown, yellow, red and white colors, respectively.

## 2. Reaction pathways of O<sub>2</sub> dissociation on perfect surface.

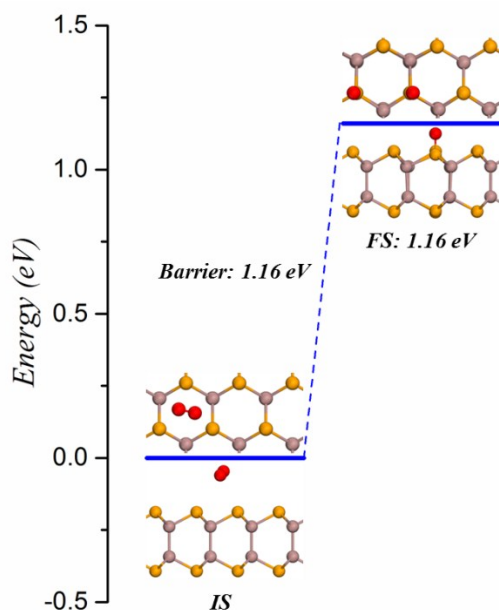

**Fig. S2.** Energy difference of initial (O<sub>2</sub> physisorbed on the surface of GaSe) and final state (O<sub>2</sub> dissociated and adsorbed onto surface of GaSe and formed Se-O bond)

## 3. HSE band for monolayer GaSe from monolayer to four-layer

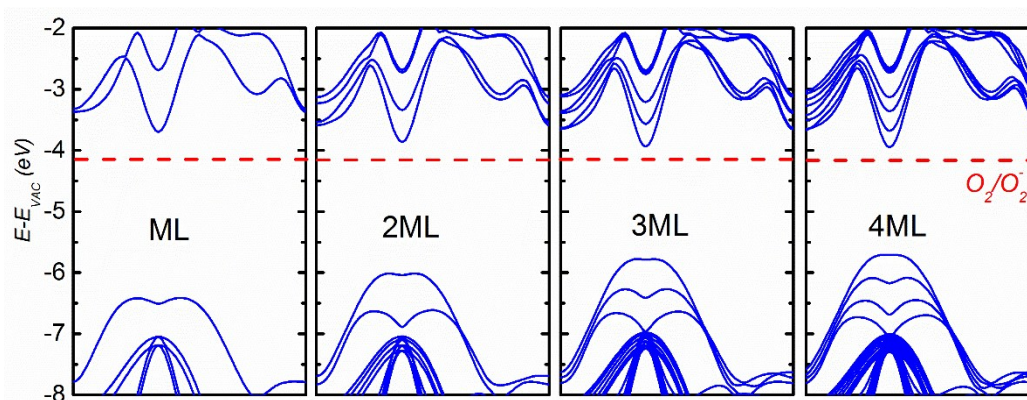

**Fig. S3.** The HSE band structure for monolayer to four layer of GaSe. The dashed line identifies the redox potential of O<sub>2</sub>/ O<sub>2</sub><sup>-</sup>.

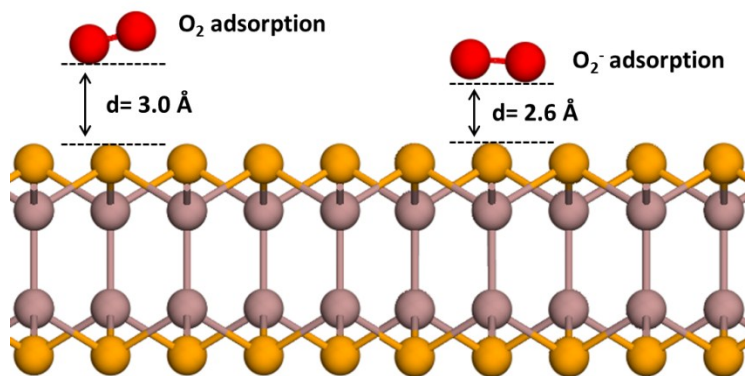

**Fig. S4** The adsorption structure of  $\text{O}_2$  and  $\text{O}_2^-$  physically adsorbing on the surface GaSe.

**Table S1** Three types of attacking Ga-Se bonds and their energy.

| Type of Ga-Se bond | I IV    | I III or II IV | II III  |
|--------------------|---------|----------------|---------|
| Energy (eV)        | 203.594 | 203.261        | 203.261 |

#### 4. Adsorbed structures of $\text{H}_2\text{O}$ and $\text{O}_2$ on SeVs

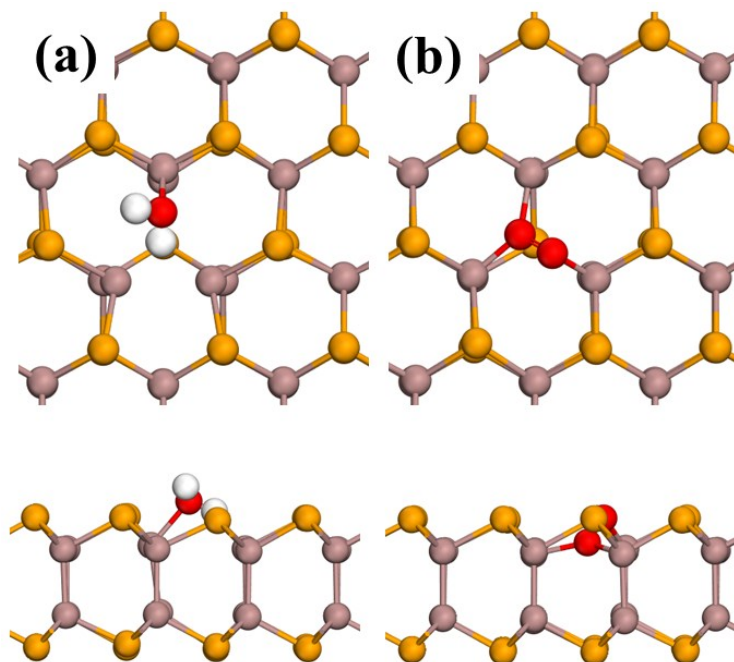

**Fig. S5.** Structures (top and side views) of  $\text{H}_2\text{O}$  (a) and  $\text{O}_2$  (b) adsorb on Se-vacancy GaSe surface, respectively.

## 5. Different reaction products of attacking Ga-Se bond

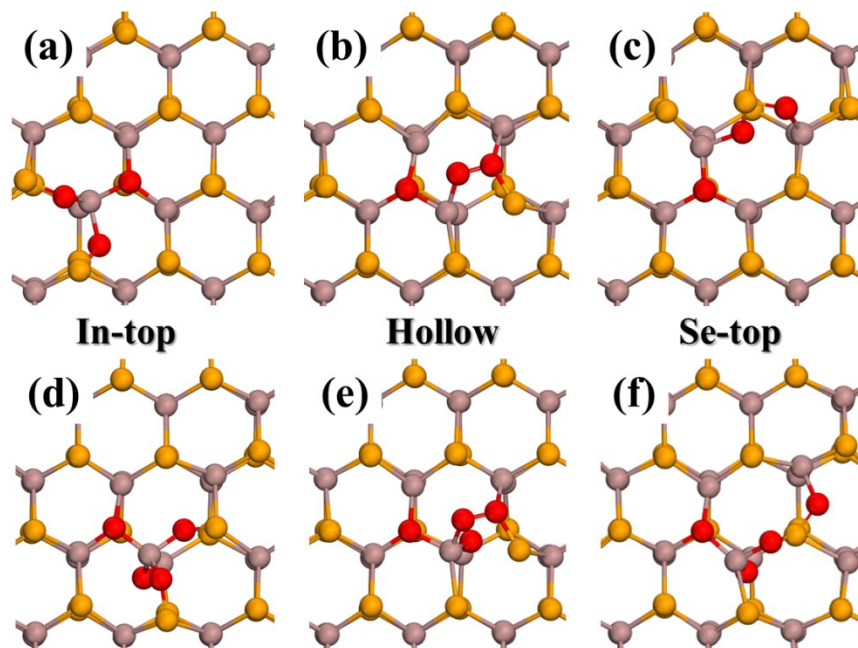

**Fig. S6.** Different reaction pathways and products of attacking Ga-Se bond: In-top, Se-top and hollow. (a), (b) and (c) for H<sub>2</sub>O-attacked SeVs; (d), (e) and (f) for O<sub>2</sub>-attacked SeVs.

**Table S2** Energy difference ( $\Delta E$ , eV) of three kinds of final reaction products with respect to physisorption.  $\Delta E = E_{\text{chem.}} - E_{\text{phy}}$

| O <sub>2</sub> attacks sites | In-top | Hollow | Se-top |
|------------------------------|--------|--------|--------|
| H <sub>2</sub> O             | -1.39  | 0.63   | -1.72  |
| O <sub>2</sub>               | -1.86  | 0.40   | -1.17  |
